# Supplementary material for: The Effects of Dexmedetomidine on Children Undergoing Magnetic Resonance Imaging: A Systematic Review and Meta-Analysis
Source: MDPI journal article supplement (doi:10.3390/children10060948), 2023-05-26
Supplement: s1 [file s1]

**THE EFFECTS OF DEXMEDETOMIDINE IN CHILDREN UNDERGOING MAGNETIC RESONANCE IMAGING (MRI):  
A SYSTEMATIC REVIEW & META-ANALYSIS.**

**journal in anticipation of publication: PEDIATRIC RADIOLOGY**

Angelopoulou Valentina-Anastasia<sup>1,2,\*</sup>, Pouliakis Abraham<sup>3</sup>, Alexiou Nikolaos<sup>4</sup>, Ioannidi Parthena<sup>5,6</sup>, Vagiona Dimitra<sup>7</sup>, Ekmektzoglou Konstantinos<sup>2,8</sup>, Xanthos Theodoros<sup>9</sup>,  
Boutsikou Theodora<sup>10</sup>, Iliodromiti Zoi<sup>10</sup>, Iacovidou Nikoletta<sup>2,10,11</sup>

<sup>1</sup> Department of Radiology, General Hospital of Elefsina “Thriasio”, Attica, Greece

<sup>2</sup> Postgraduate Study Program (MSc) "Resuscitation", School of Medicine, National and Kapodistrian University of Athens, Greece

<sup>3</sup> Second Department of Pathology, "Attikon" University Hospital, National and Kapodistrian University of Athens, Greece

<sup>4</sup> First Department of Internal Medicine, General Hospital of Elefsina “Thriasio”, Attica, Greece

<sup>5</sup> Department of Invasive Radiology, General Hospital of Athens “Evangelismos”, Greece

<sup>6</sup> European Board of Interventional Radiology (EBIR)

<sup>7</sup> Primary Health Center of Nevrokopi, General Hospital of Drama, Drama, Greece

<sup>8</sup> School of Medicine, European University Cyprus, Nicosia, Cyprus

<sup>9</sup> School of Health Sciences, University of West Attica, Greece

<sup>10</sup> School of Medicine, National and Kapodistrian University of Athens, Greece

<sup>11</sup> Department of Neonatology, “Aretaieio” Hospital, School of Medicine, National and Kapodistrian University of Athens, Greece

\*Corresponding author:

Angelopoulou Valentina-Anastasia, Elefsina, Attica, Greece (postal code: 19 200)

Contact information:

phone number: +30 697 8142824

email: valeange274@gmail.com

ORCID ID: 0000-0003-3116-8984

| Section and Topic             | Item # | Checklist item                                                                                                                                                                                                                                                                                       | Location where item is reported                                                 |
|-------------------------------|--------|------------------------------------------------------------------------------------------------------------------------------------------------------------------------------------------------------------------------------------------------------------------------------------------------------|---------------------------------------------------------------------------------|
| <b>TITLE</b>                  |        |                                                                                                                                                                                                                                                                                                      |                                                                                 |
| Title                         | 1      | Identify the report as a systematic review.                                                                                                                                                                                                                                                          | <i>see title</i>                                                                |
| <b>ABSTRACT</b>               |        |                                                                                                                                                                                                                                                                                                      |                                                                                 |
| Abstract                      | 2      | See the PRISMA 2020 for Abstracts checklist.                                                                                                                                                                                                                                                         | <i>see PRISMA-A (attached as well)</i>                                          |
| <b>INTRODUCTION</b>           |        |                                                                                                                                                                                                                                                                                                      |                                                                                 |
| Rationale                     | 3      | Describe the rationale for the review in the context of existing knowledge.                                                                                                                                                                                                                          | <i>see introduction</i>                                                         |
| Objectives                    | 4      | Provide an explicit statement of the objective(s) or question(s) the review addresses.                                                                                                                                                                                                               | <i>see aim</i>                                                                  |
| <b>METHODS</b>                |        |                                                                                                                                                                                                                                                                                                      |                                                                                 |
| Eligibility criteria          | 5      | Specify the inclusion and exclusion criteria for the review and how studies were grouped for the syntheses.                                                                                                                                                                                          | <i>See study selection and data extraction</i>                                  |
| Information sources           | 6      | Specify all databases, registers, websites, organisations, reference lists and other sources searched or consulted to identify studies. Specify the date when each source was last searched or consulted.                                                                                            | <i>See search strategy</i>                                                      |
| Search strategy               | 7      | Present the full search strategies for all databases, registers and websites, including any filters and limits used.                                                                                                                                                                                 | <i>See search strategy</i>                                                      |
| Selection process             | 8      | Specify the methods used to decide whether a study met the inclusion criteria of the review, including how many reviewers screened each record and each report retrieved, whether they worked independently, and if applicable, details of automation tools used in the process.                     | <i>See study selection and data extraction</i>                                  |
| Data collection process       | 9      | Specify the methods used to collect data from reports, including how many reviewers collected data from each report, whether they worked independently, any processes for obtaining or confirming data from study investigators, and if applicable, details of automation tools used in the process. | <i>See data extraction</i>                                                      |
| Data items                    | 10a    | List and define all outcomes for which data were sought. Specify whether all results that were compatible with each outcome domain in each study were sought (e.g. for all measures, time points, analyses), and if not, the methods used to decide which results to collect.                        | <i>See material and methods &amp; See Study Selection &amp; Data extraction</i> |
|                               | 10b    | List and define all other variables for which data were sought (e.g. participant and intervention characteristics, funding sources). Describe any assumptions made about any missing or unclear information.                                                                                         | <i>see section "Statistical methods" for missing values estimation</i>          |
| Study risk of bias assessment | 11     | Specify the methods used to assess risk of bias in the included studies, including details of the tool(s) used, how many reviewers assessed each study and whether they worked independently, and if applicable, details of automation tools used in the process.                                    | <i>See quality and risk of bias assessment</i>                                  |
| Effect measures               | 12     | Specify for each outcome the effect measure(s) (e.g. risk ratio, mean difference) used in the synthesis or presentation of results.                                                                                                                                                                  | <i>See statistical analysis</i>                                                 |
| Synthesis methods             | 13a    | Describe the processes used to decide which studies were eligible for each synthesis (e.g. tabulating the study intervention characteristics and comparing against the planned groups for each synthesis (item #5)).                                                                                 | <i>See Extraction of data &amp; see statistical analysis</i>                    |
|                               | 13b    | Describe any methods required to prepare the data for presentation or synthesis, such as handling of missing summary statistics, or data conversions.                                                                                                                                                | <i>See statistical analysis</i>                                                 |
|                               | 13c    | Describe any methods used to tabulate or visually display results of individual studies and syntheses.                                                                                                                                                                                               | <i>See statistical analysis</i>                                                 |
|                               | 13d    | Describe any methods used to synthesize results and provide a rationale for the choice(s). If meta-analysis was performed, describe the model(s), method(s) to identify the presence and extent of statistical heterogeneity, and software package(s) used.                                          | <i>See statistical analysis</i>                                                 |
|                               | 13e    | Describe any methods used to explore possible causes of heterogeneity among study results (e.g. subgroup                                                                                                                                                                                             | <i>See "Analysis results" we tried to remove some</i>                           |

| Section and Topic             | Item # | Checklist item                                                                                                                                                                                                                                                                       | Location where item is reported                                                                      |
|-------------------------------|--------|--------------------------------------------------------------------------------------------------------------------------------------------------------------------------------------------------------------------------------------------------------------------------------------|------------------------------------------------------------------------------------------------------|
|                               |        | analysis, meta-regression).                                                                                                                                                                                                                                                          | <i>studies</i>                                                                                       |
|                               | 13f    | Describe any sensitivity analyses conducted to assess robustness of the synthesized results.                                                                                                                                                                                         | <i>Funnel plots</i>                                                                                  |
| Reporting bias assessment     | 14     | Describe any methods used to assess risk of bias due to missing results in a synthesis (arising from reporting biases).                                                                                                                                                              | <i>Not applicable (NA)</i>                                                                           |
| Certainty assessment          | 15     | Describe any methods used to assess certainty (or confidence) in the body of evidence for an outcome.                                                                                                                                                                                | <i>Calculation of Heterogeneity index</i>                                                            |
| <b>RESULTS</b>                |        |                                                                                                                                                                                                                                                                                      |                                                                                                      |
| Study selection               | 16a    | Describe the results of the search and selection process, from the number of records identified in the search to the number of studies included in the review, ideally using a flow diagram.                                                                                         | <i>See study selection and characteristics of included studies.<br/>see also PRISMA flow diagram</i> |
|                               | 16b    | Cite studies that might appear to meet the inclusion criteria, but which were excluded, and explain why they were excluded.                                                                                                                                                          | <i>See study selection and characteristics of included studies.<br/>see also PRISMA diagram</i>      |
| Study characteristics         | 17     | Cite each included study and present its characteristics.                                                                                                                                                                                                                            | <i>See table 1</i>                                                                                   |
| Risk of bias in studies       | 18     | Present assessments of risk of bias for each included study.                                                                                                                                                                                                                         | <i>See quality assessment – risk of bias.<br/>See also Sup.Fig. 1 &amp; 2</i>                        |
| Results of individual studies | 19     | For all outcomes, present, for each study: (a) summary statistics for each group (where appropriate) and (b) an effect estimate and its precision (e.g. confidence/credible interval), ideally using structured tables or plots.                                                     | <i>See analysis' results</i>                                                                         |
| Results of syntheses          | 20a    | For each synthesis, briefly summarise the characteristics and risk of bias among contributing studies.                                                                                                                                                                               | <i>See analysis' results</i>                                                                         |
|                               | 20b    | Present results of all statistical syntheses conducted. If meta-analysis was done, present for each the summary estimate and its precision (e.g. confidence/credible interval) and measures of statistical heterogeneity. If comparing groups, describe the direction of the effect. | <i>See analysis' results</i>                                                                         |
|                               | 20c    | Present results of all investigations of possible causes of heterogeneity among study results.                                                                                                                                                                                       | <i>NA</i>                                                                                            |
|                               | 20d    | Present results of all sensitivity analyses conducted to assess the robustness of the synthesized results.                                                                                                                                                                           | <i>see appendix funnel plots</i>                                                                     |
| Reporting biases              | 21     | Present assessments of risk of bias due to missing results (arising from reporting biases) for each synthesis assessed.                                                                                                                                                              | <i>NA</i>                                                                                            |
| Certainty of evidence         | 22     | Present assessments of certainty (or confidence) in the body of evidence for each outcome assessed.                                                                                                                                                                                  | <i>See Heterogeneity index</i>                                                                       |
| <b>DISCUSSION</b>             |        |                                                                                                                                                                                                                                                                                      |                                                                                                      |
| Discussion                    | 23a    | Provide a general interpretation of the results in the context of other evidence.                                                                                                                                                                                                    | <i>See discussion</i>                                                                                |
|                               | 23b    | Discuss any limitations of the evidence included in the review.                                                                                                                                                                                                                      | <i>See discussion</i>                                                                                |
|                               | 23c    | Discuss any limitations of the review processes used.                                                                                                                                                                                                                                | <i>See discussion</i>                                                                                |
|                               | 23d    | Discuss implications of the results for practice, policy, and future research.                                                                                                                                                                                                       | <i>See discussion</i>                                                                                |
|                               |        |                                                                                                                                                                                                                                                                                      |                                                                                                      |

| Section and Topic                              | Item # | Checklist item                                                                                                                                                                                                                             | Location where item is reported                                                                                                                                  |
|------------------------------------------------|--------|--------------------------------------------------------------------------------------------------------------------------------------------------------------------------------------------------------------------------------------------|------------------------------------------------------------------------------------------------------------------------------------------------------------------|
| <b>OTHER INFORMATION</b>                       |        |                                                                                                                                                                                                                                            |                                                                                                                                                                  |
| Registration and protocol                      | 24a    | Provide registration information for the review, including register name and registration number, or state that the review was not registered.                                                                                             | <i>The review was submitted and approved by the university's tree-member postgraduate committee, however was not registered in any database such as Prospero</i> |
|                                                | 24b    | Indicate where the review protocol can be accessed, or state that a protocol was not prepared.                                                                                                                                             | <i>The protocol was submitted and approved by the university's tree-member postgraduate committee. See in the minutes of meetings of the committee.</i>          |
|                                                | 24c    | Describe and explain any amendments to information provided at registration or in the protocol.                                                                                                                                            | <i>NA</i>                                                                                                                                                        |
| Support                                        | 25     | Describe sources of financial or non-financial support for the review, and the role of the funders or sponsors in the review.                                                                                                              | <i>This study was not supported by external funding.</i>                                                                                                         |
| Competing interests                            | 26     | Declare any competing interests of review authors.                                                                                                                                                                                         | <i>The authors have no conflict of interest to disclose.</i>                                                                                                     |
| Availability of data, code and other materials | 27     | Report which of the following are publicly available and where they can be found: template data collection forms; data extracted from included studies; data used for all analyses; analytic code; any other materials used in the review. | <i>Data can be obtained from the corresponding author upon a reasonable request.</i>                                                                             |

From: Page MJ, McKenzie JE, Bossuyt PM, Boutron I, Hoffmann TC, Mulrow CD, et al. The PRISMA 2020 statement: an updated guideline for reporting systematic reviews. BMJ 2021;372:n71. doi: 10.1136/bmj.n71  
For more information, visit: <http://www.prisma-statement.org/>
