# Supplementary material for: The Effects of Dexmedetomidine on Children Undergoing Magnetic Resonance Imaging: A Systematic Review and Meta-Analysis
Source: MDPI journal article supplement (doi:10.3390/children10060948), 2023-05-26
Supplement: s1 [file s1]

# THE EFFECTS OF DEXMEDETOMIDINE ON CHILDREN UNDERGOING MAGNETIC RESONANCE IMAGING: A SYSTEMATIC REVIEW & ME-TA-ANALYSIS.

Angelopoulou Valentina-Anastasia<sup>1,2,\*</sup>, Pouliakis Abraham<sup>3,\*</sup>, Alexiou Nikolaos<sup>4</sup>, Ioannidi Parthena<sup>5,6</sup>, Vagiona Dimitra<sup>7</sup>, Ekmektzoglou Konstantinos<sup>2,8</sup>, Xanthos Theodoros<sup>9</sup>, Boutsikou Theodora<sup>10</sup>, Iliodromiti Zoi<sup>10</sup> and Iacovidou Nikoleta<sup>2,10</sup>

- 1 Department of Radiology, General Hospital of Elefsina "Thriasio", Attica, Greece
- 2 Postgraduate Study Program (MSc) "Resuscitation", School of Medicine, National and Kapodistrian University of Athens, Greece
- 3 Second Department of Pathology, "Attikon" University Hospital, National and Kapodistrian University of Athens, Athens, Greece
- 4 First Department of Internal Medicine, General Hospital of Elefsina "Thriasio", Attica, Greece
- 5 Department of Invasive Radiology, General Hospital of Athens "Evangelismos", Athens, Greece
- 6 European Board of Interventional Radiology (EBIR)
- 7 Primary Health Center of Nevrokopi, General Hospital of Drama, Drama, Greece
- 8 School of Medicine, European University Cyprus, Nicosia, Cyprus
- 9 School of Health Sciences, University of West Attica, Athens, Greece
- 10 Department of Neonatology, "Aretaieio" Hospital, School of Medicine, National and Kapodistrian University of Athens, Athens, Greece

## **\*Correspondence:**

Abraham Pouliakis:

apoul967@gmail.com; phone number: mob: +30 697 2846977; tel: +30 210 5831958 & 5831953; fax: +30 210 5831942

Angelopoulou Valentina-Anastasia:

valeange274@gmail.com; phone number: mob: +30 697 8142824

## FIGURES of BIAS ASSESSMENT of the included studies

| Unique ID | Study ID               | Experimental | Comparator | Outcome | Weight | D1 | D2 | D3 | D4 | D5 | Overall |   |                                               |
|-----------|------------------------|--------------|------------|---------|--------|----|----|----|----|----|---------|---|-----------------------------------------------|
| 1         | Olgun et al (2018)     | NA           | NA         | NA      | 1      | !  | +  | +  | +  | +  | !       | + | Low risk                                      |
| 2         | Siddappa et al (2011)  | NA           | NA         | NA      | 1      | +  | !  | +  | +  | !  | !       | ! | Some concerns                                 |
| 3         | Mason et al (2011)     | NA           | NA         | NA      | 1      | !  | !  | +  | +  | +  | !       | ! | High risk                                     |
| 4         | Abulebda et al (2018)  | NA           | NA         | NA      | 1      | +  | +  | +  | +  | +  | +       | + |                                               |
| 5         | Mason et al (2010)     | NA           | NA         | NA      | 1      | !  | +  | +  | +  | !  | !       | ! | D1 Randomisation process                      |
| 6         | Kamal et al (2017)     | NA           | NA         | NA      | 1      | +  | +  | +  | +  | !  | !       | ! | D2 Deviations from the intended interventions |
| 7         | Eldeek et al (2016)    | NA           | NA         | NA      | 1      | +  | +  | +  | +  | !  | !       | ! | D3 Missing outcome data                       |
| 8         | Tammam (2013)          | NA           | NA         | NA      | 1      | +  | +  | +  | +  | !  | !       | ! | D4 Measurement of the outcome                 |
| 9         | Sriganesh et al (2018) | NA           | NA         | NA      | 1      | +  | +  | +  | +  | +  | +       | + | D5 Selection of the reported result           |
| 10        | Ahmed et al (2015)     | NA           | NA         | NA      | 1      | !  | +  | +  | +  | !  | !       | ! |                                               |
| 11        | Tammam et al (2013)    | NA           | NA         | NA      | 1      | +  | +  | +  | +  | !  | !       | ! |                                               |
| 12        | Debashish et al (2020) | NA           | NA         | NA      | 1      | +  | +  | +  | +  | +  | +       | + |                                               |
| 13        | Mason et al (2014)     | NA           | NA         | NA      | 1      | !  | +  | +  | +  | !  | !       | ! |                                               |

Sup.fig.1: Bias assessment diagram formed after evaluating the studies with RoB-2 tool

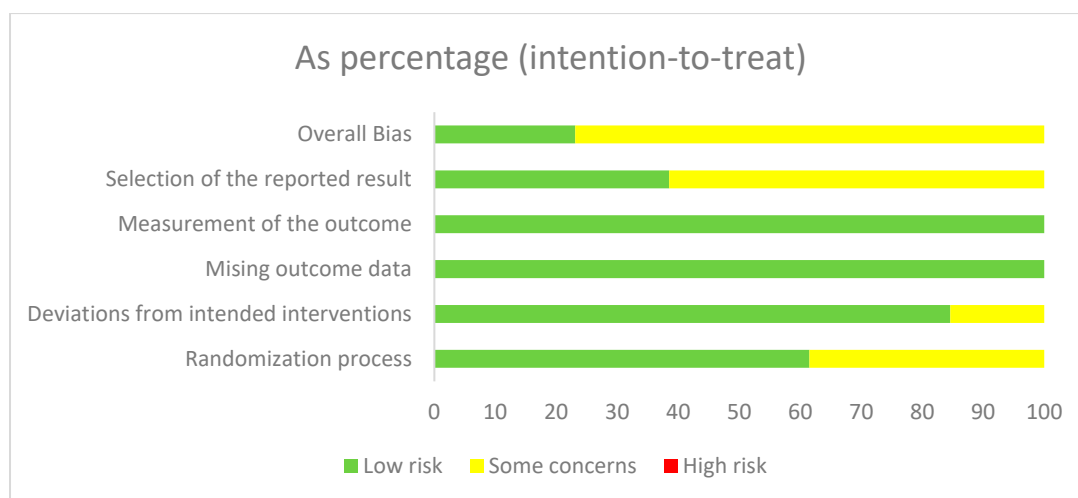

Sup.fig.2: Bias assessment as percentage, after evaluating the studies with RoB-2 tool

|                                                              | Randomization process | Deviations from intended interventions | Missing outcome data | Measurement of the outcome | Selection of the reported result | Overall Bias |
|--------------------------------------------------------------|-----------------------|----------------------------------------|----------------------|----------------------------|----------------------------------|--------------|
| Assignment to intervention (the 'intention-to-treat' effect) |                       |                                        |                      |                            |                                  |              |
| Total number of study = 13                                   |                       |                                        |                      |                            |                                  |              |
| Low risk                                                     | 61,5                  | 84,6                                   | 100                  | 100                        | 38,5                             | 23,1         |
| Some concerns                                                | 38,5                  | 15,4                                   | 0                    | 0                          | 61,5                             | 76,9         |
| High risk                                                    | 0                     | 0                                      | 0                    | 0                          | 0                                | 0            |

Sup.fig.3: bias assessment as percentage, after evaluating the studies with RoB-2 tool

# FOREST AND FUNNEL PLOTS

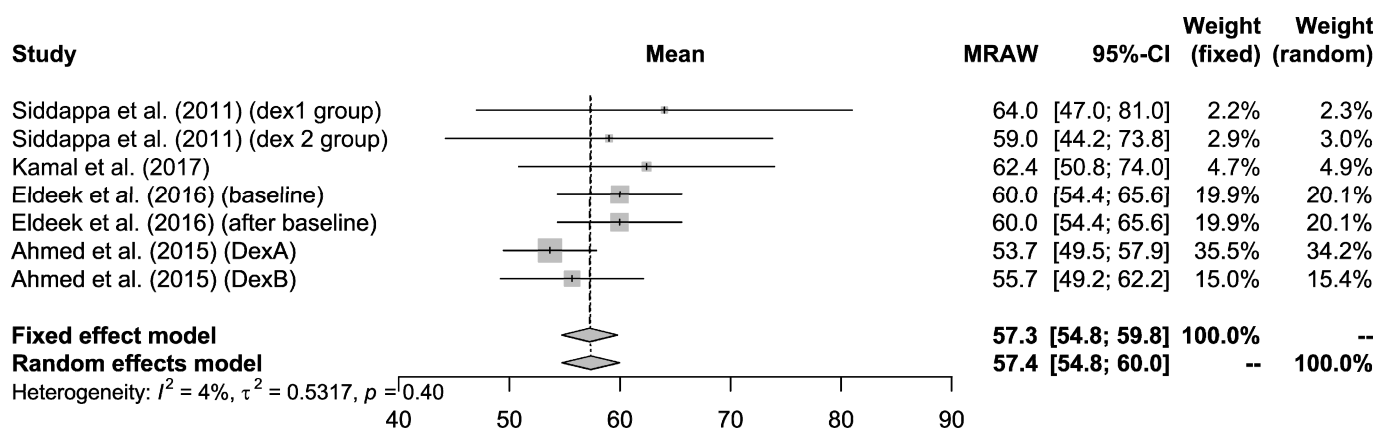

Sup.fig.4: Forest plot of participants' age (months)

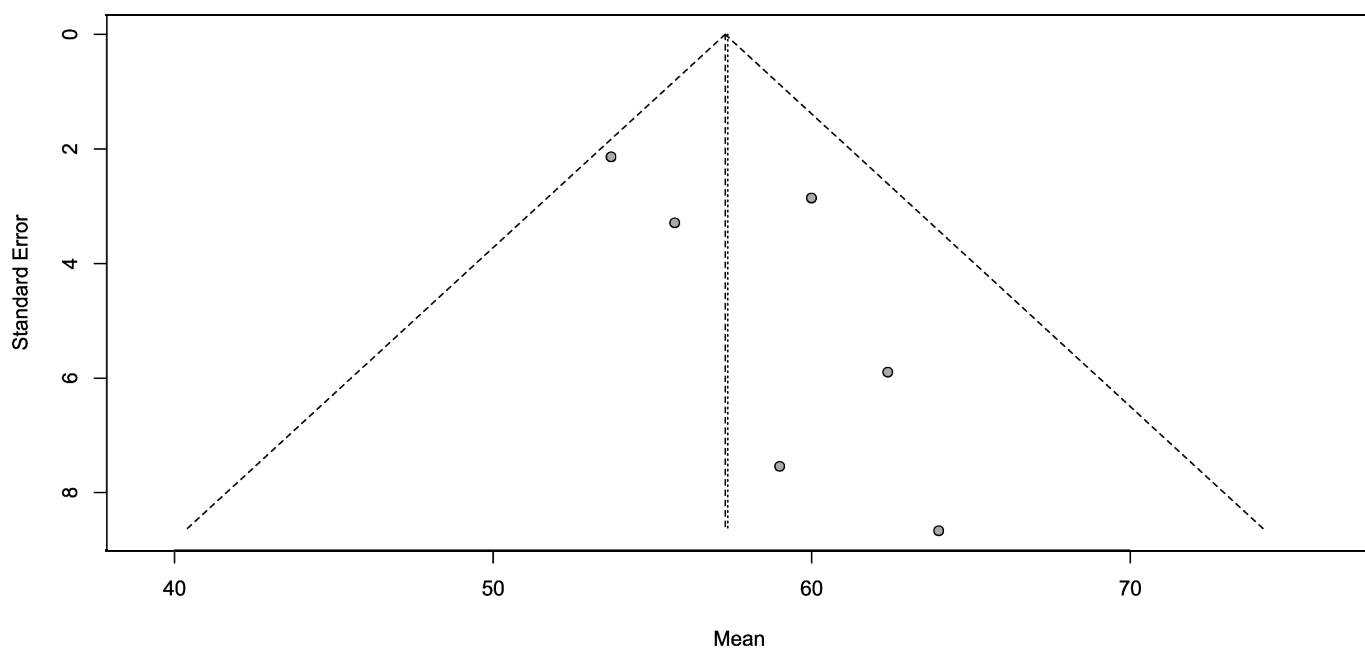

Sup.fig.5: Funnel plot of participants' age (months)

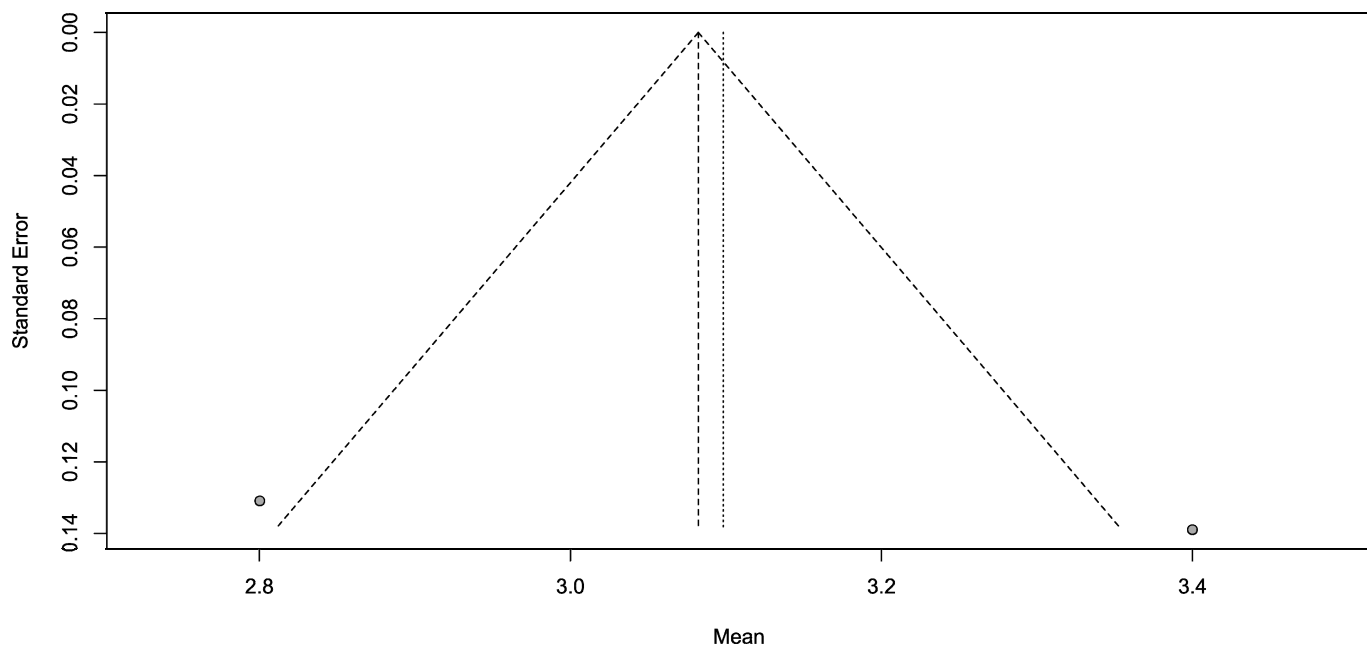

Sup.fig.6: Funnel plot about the induction dose of DEX

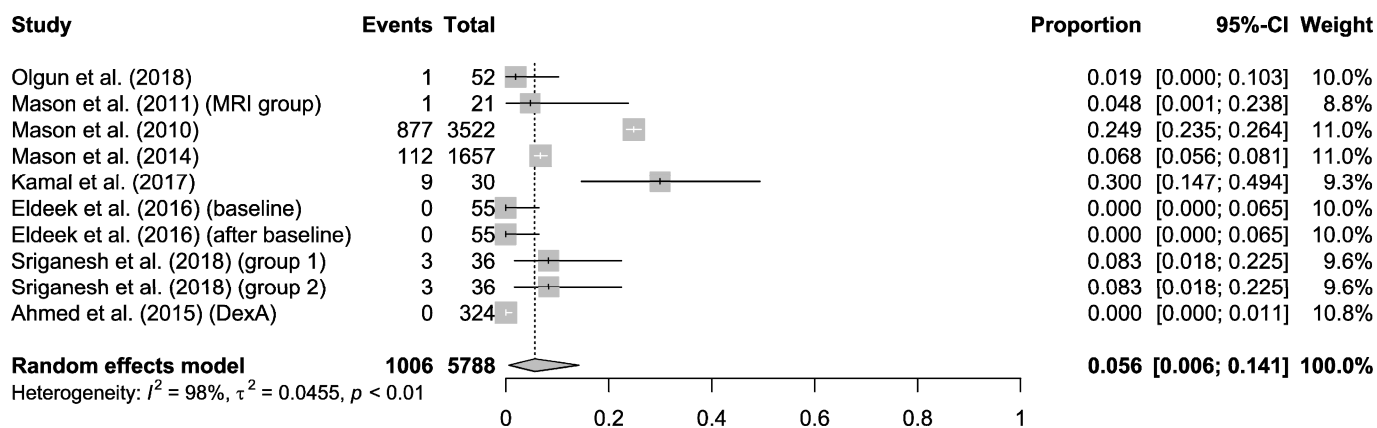

Sup.fig.7: Forest plot about the need of additional dose of DEX

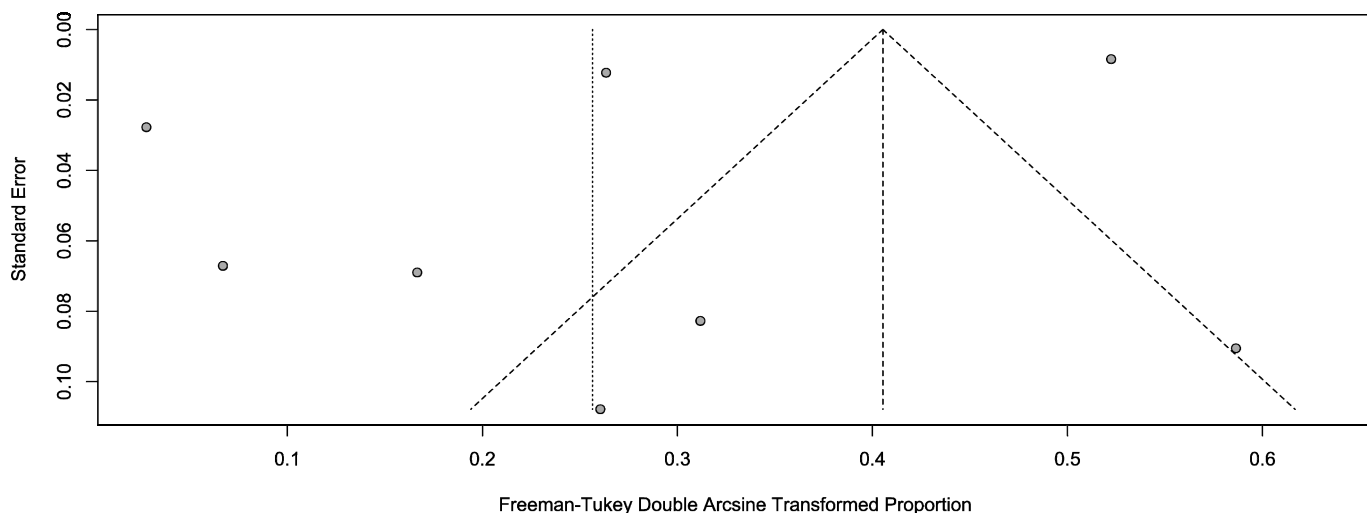

Sup.fig.8: Funnel plot about additional doses of DEX

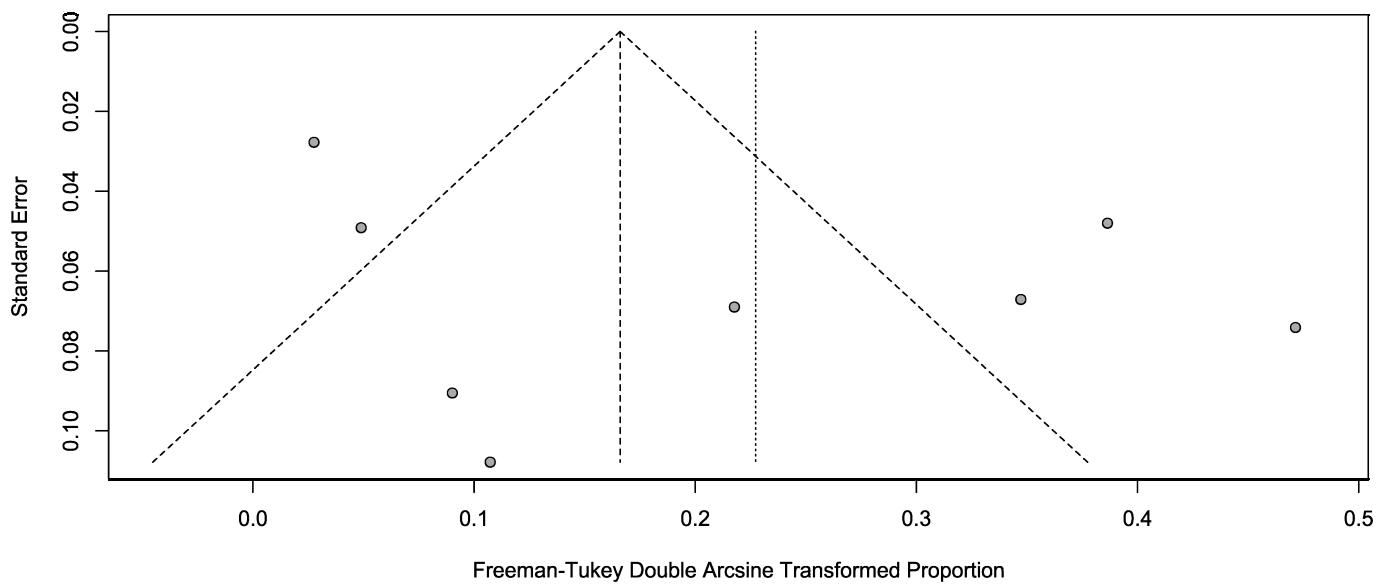

Sup.fig.9: Funnel plot about DEX's failure

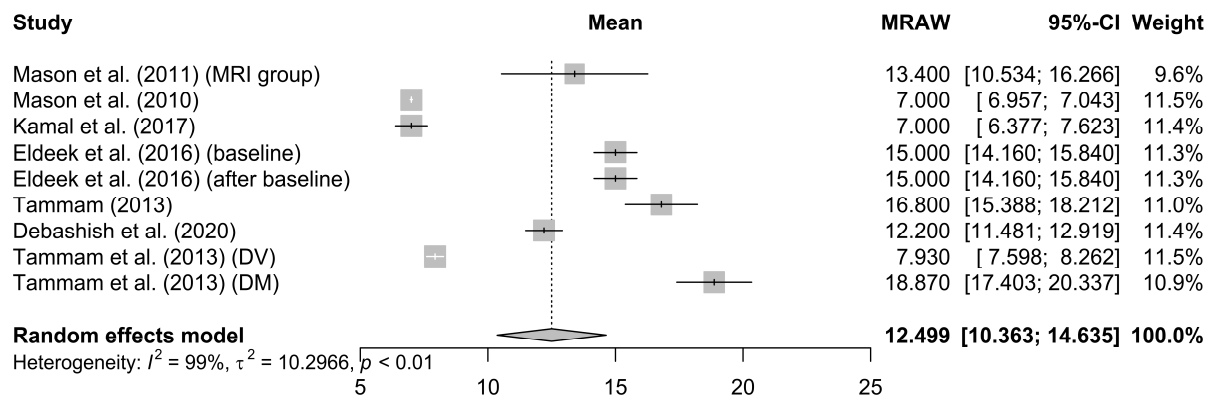

Sup.fig.10: Forest plot of onset time

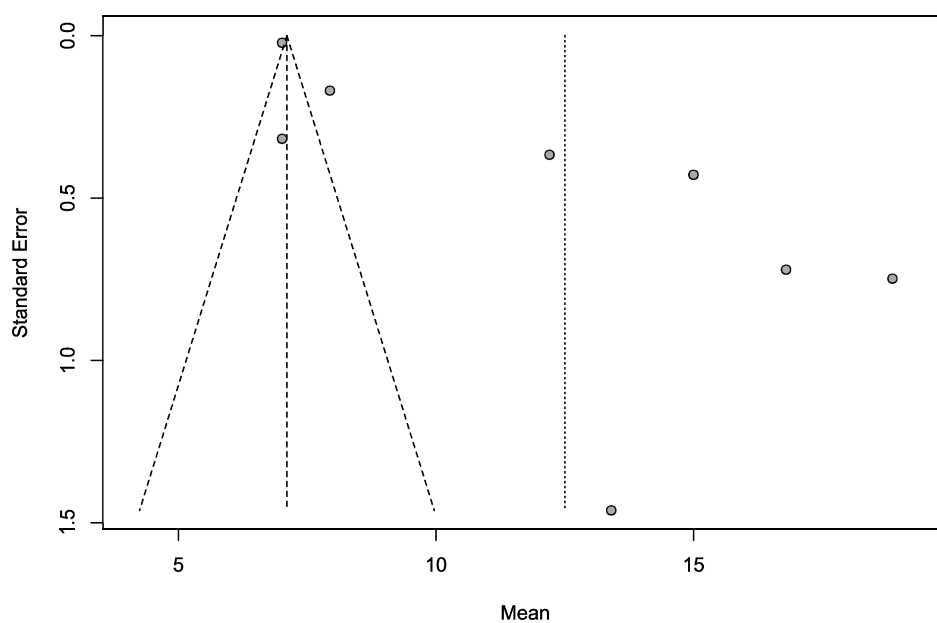

Sup.fig.11: Funnel plot of onset time.

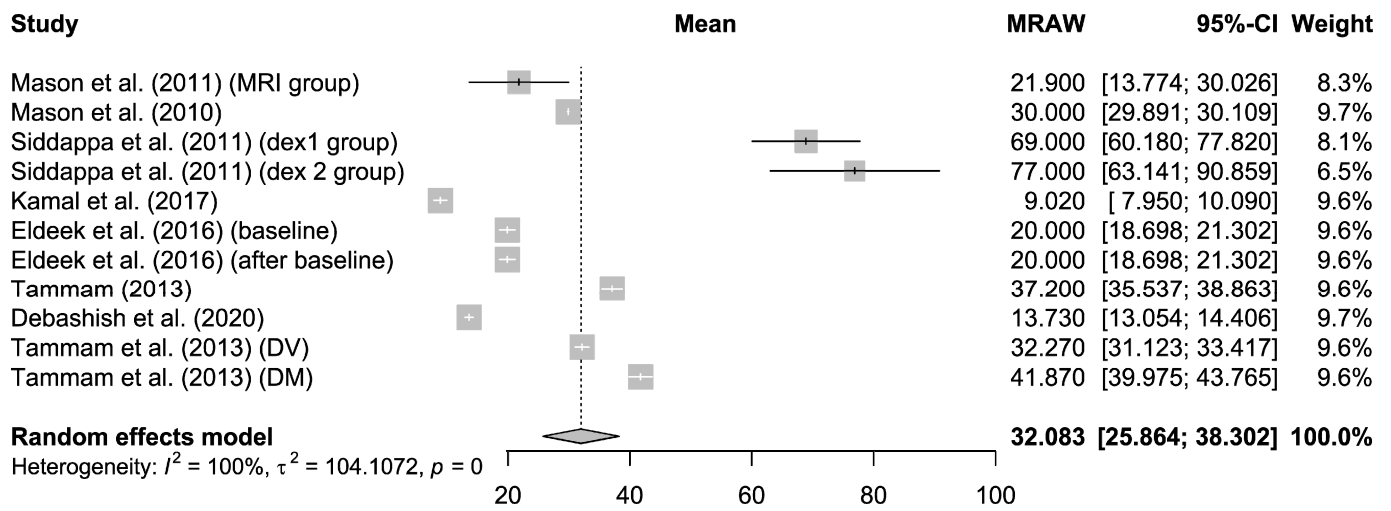

Sup.fig.12: Forest plot for the recovery time

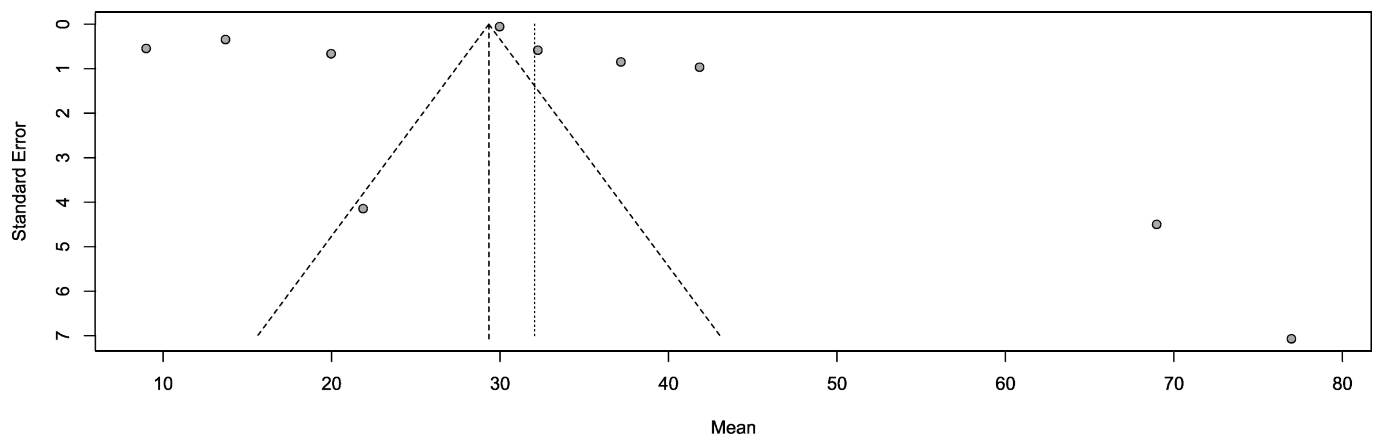

Sup.fig.13: Funnel plot about recovery time

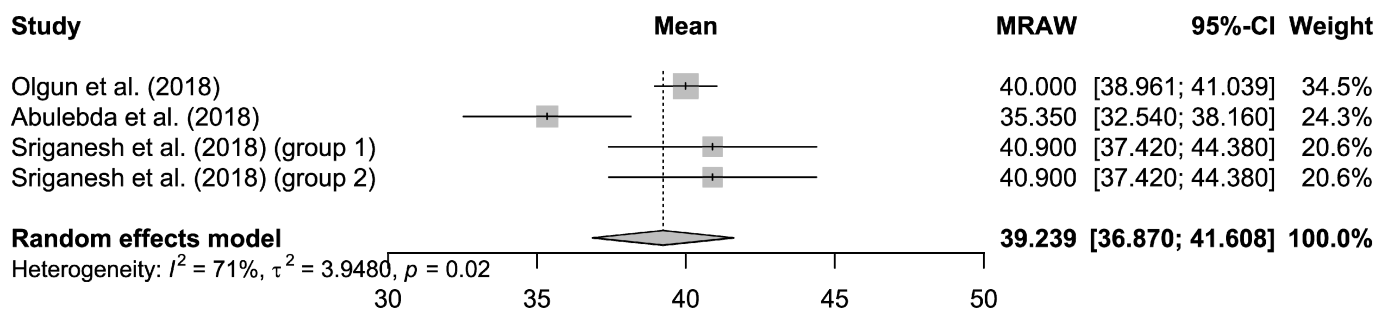

Sup.fig.14: Forest plot of total time

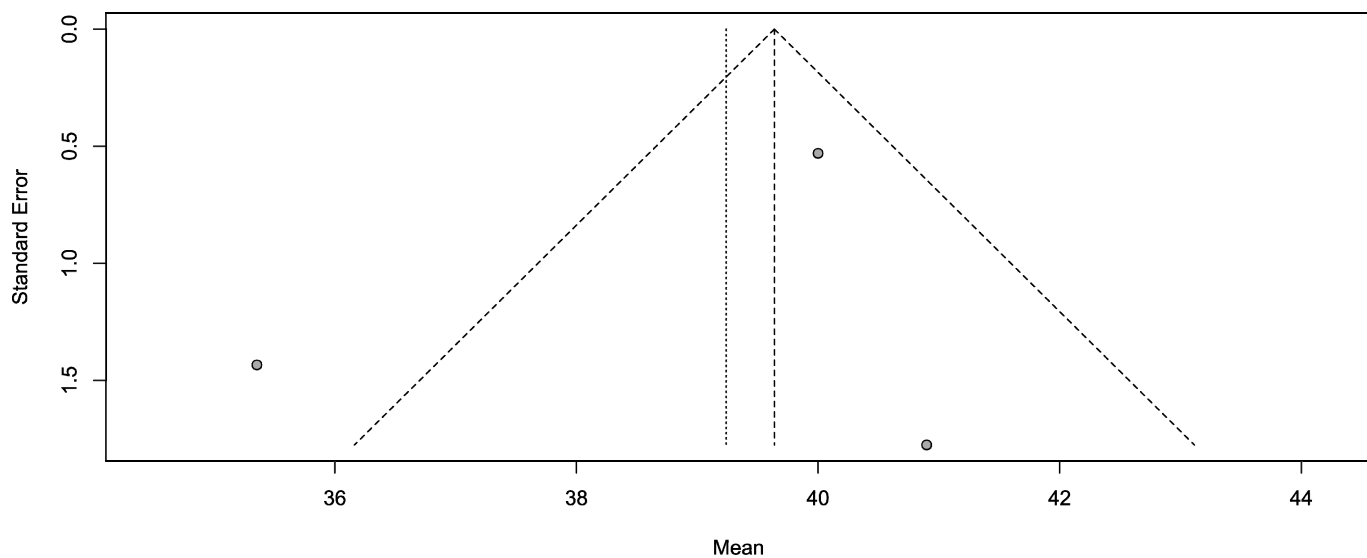

Sup.fig.15: Funnel plot of total time

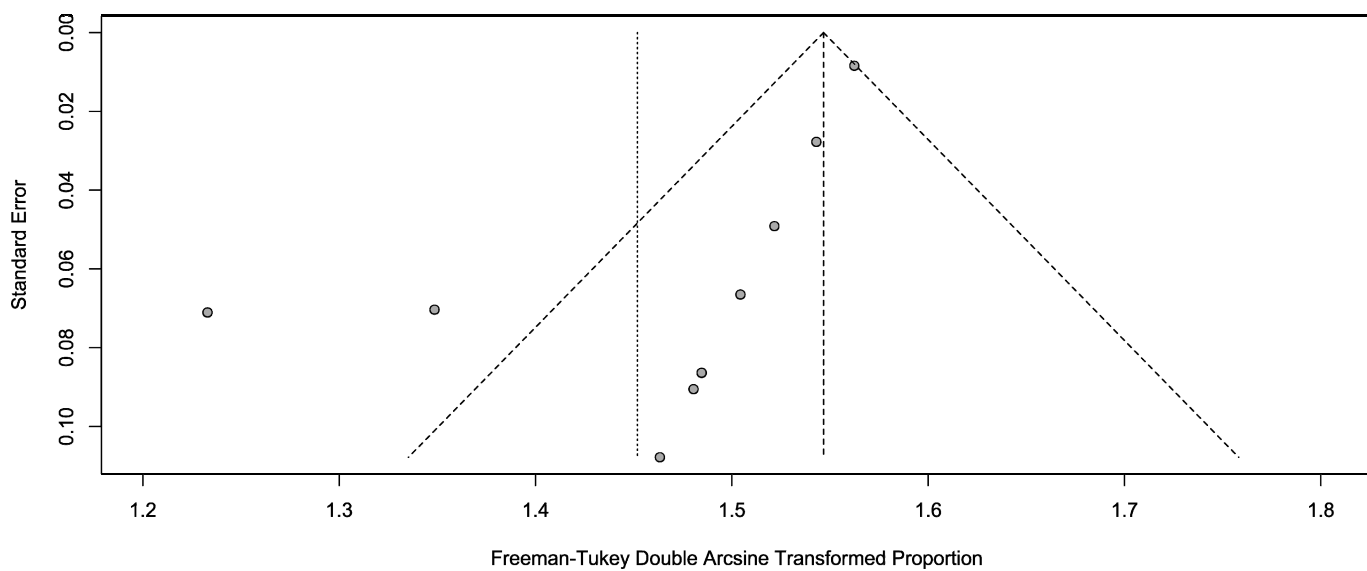

sup.fig.16: Funnel plot of method's efficiency

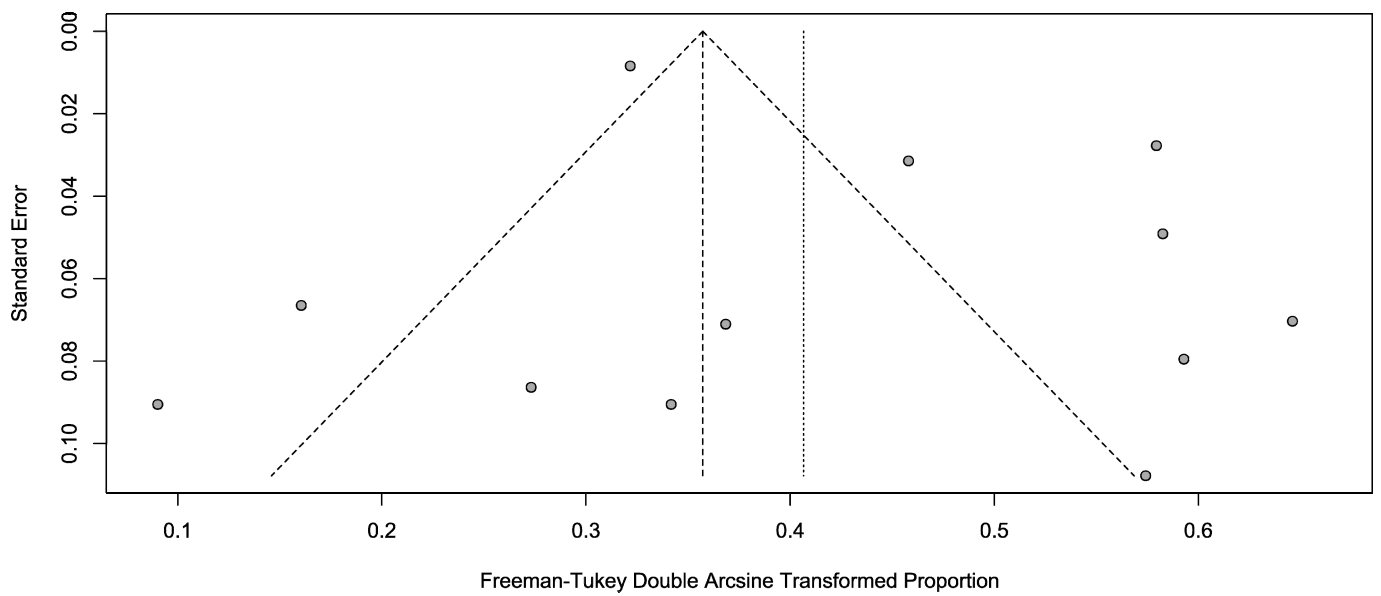

sup.fig.17: Funnel plot of method's safety

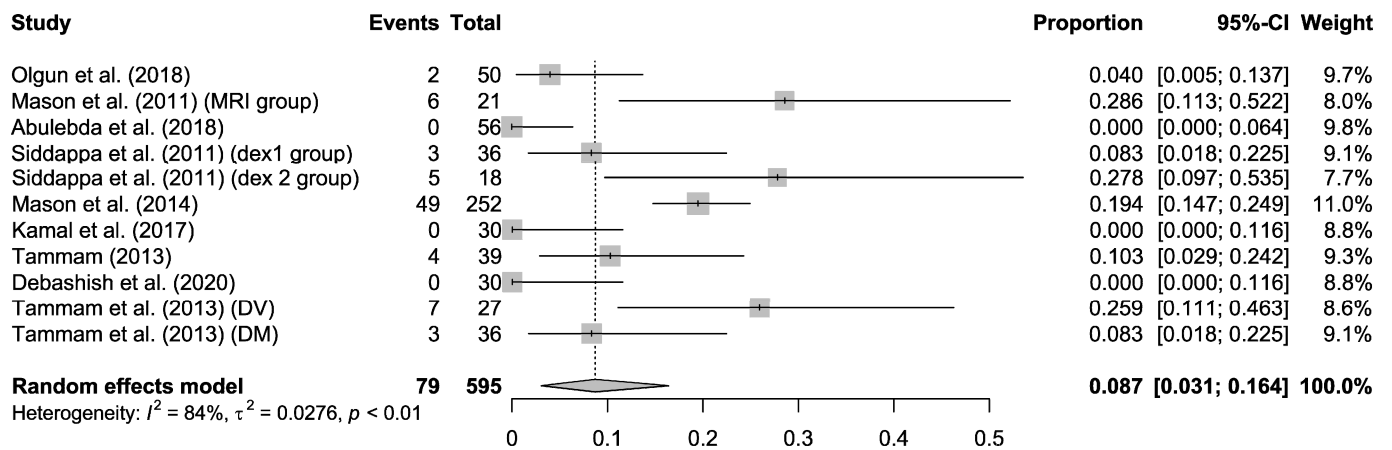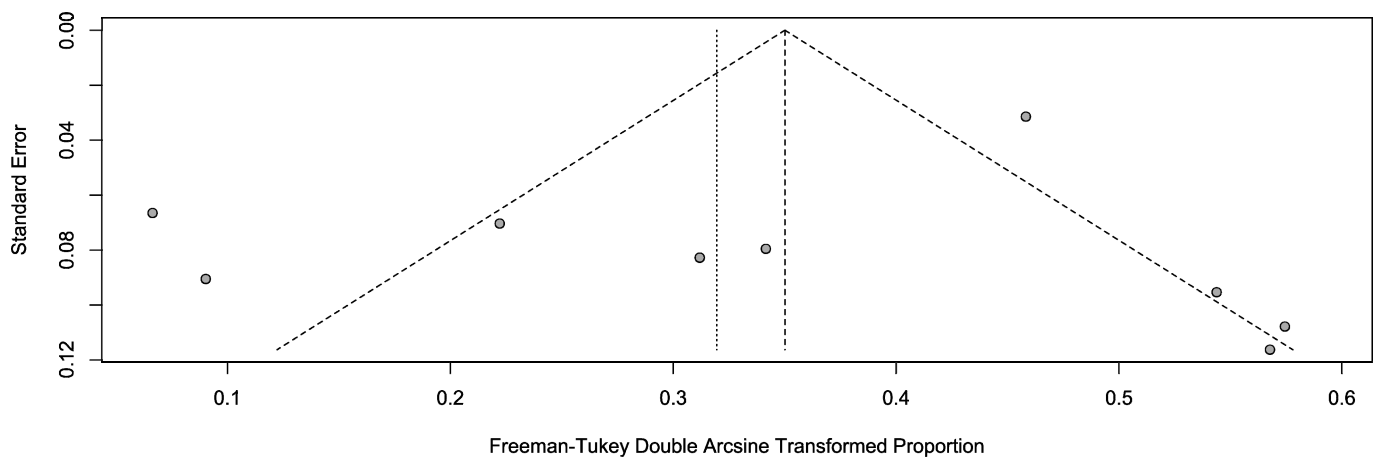

sup.fig.19: Funnel plot for hypotension.



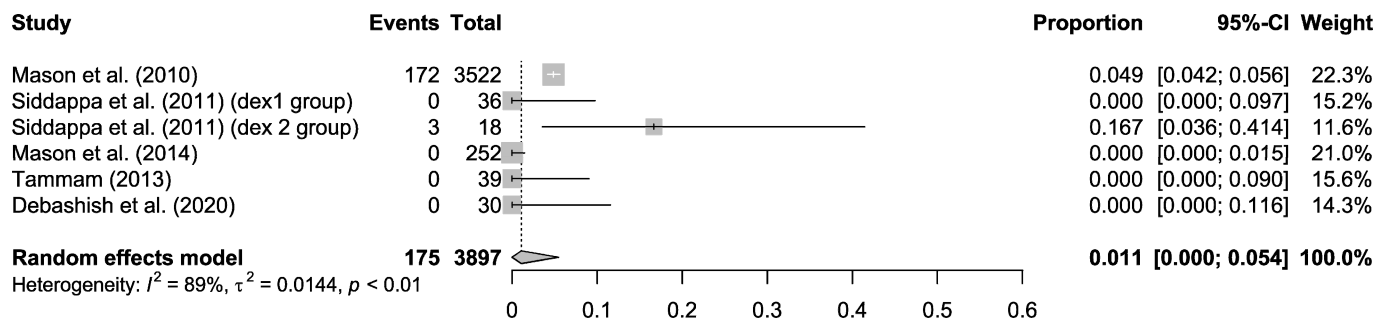

suppl.fig.20: Forest plot of hypertension

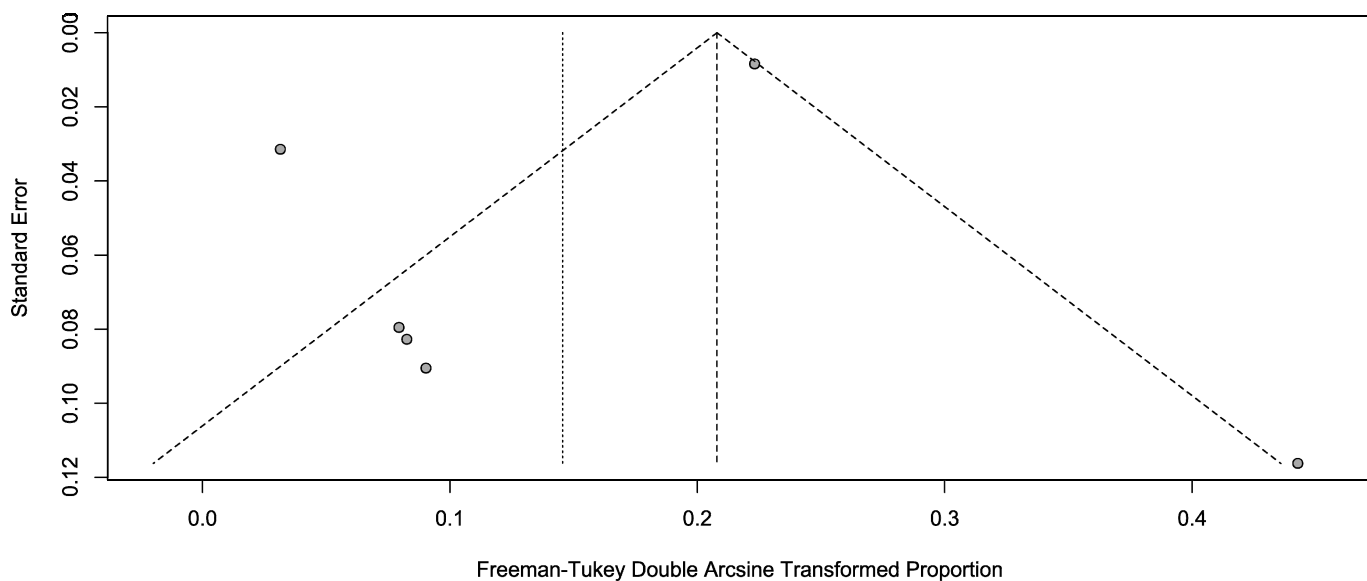

sup.fig.21: Funnel plot for hypertension

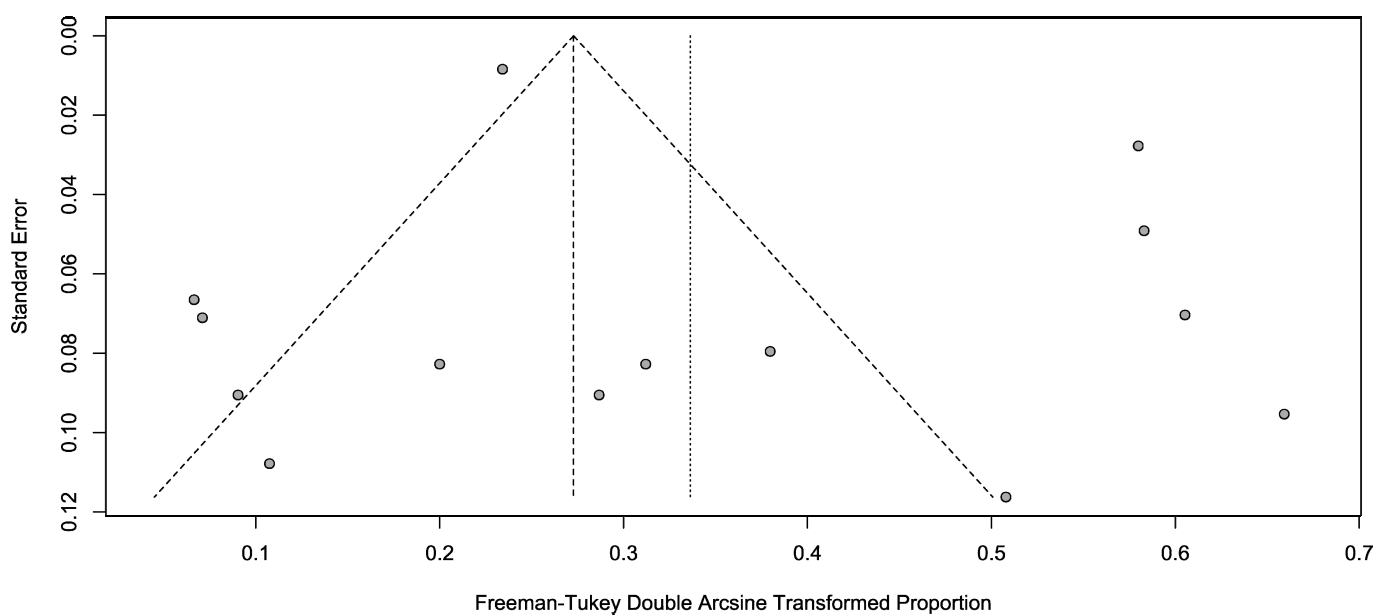

sup.fig.22: Funnel plot for bradycardia

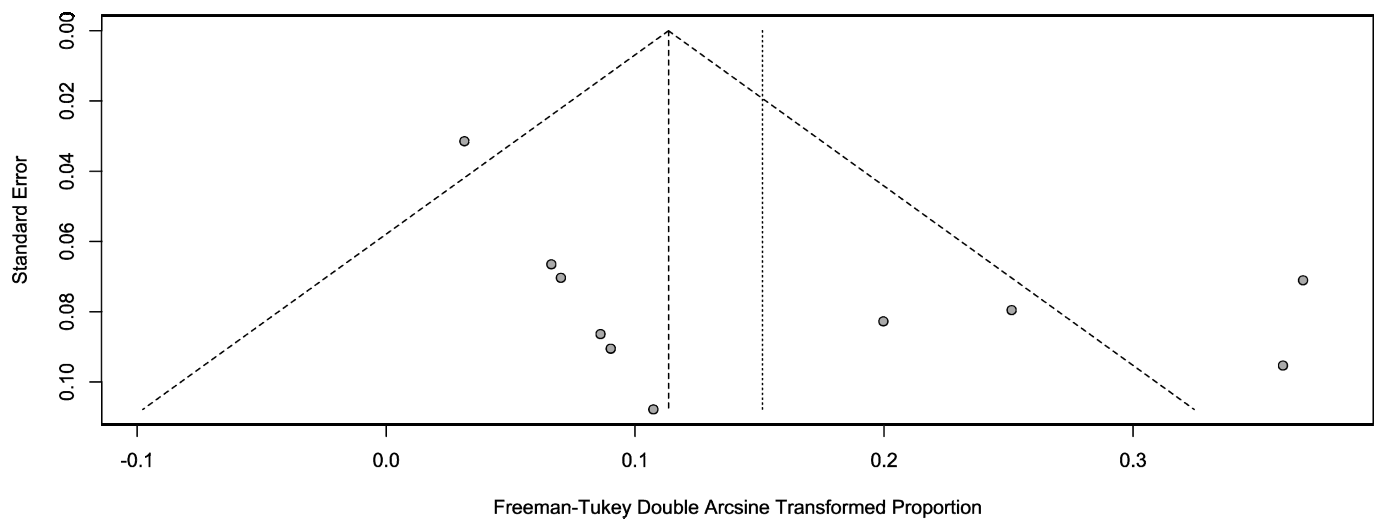

sup.fig.23: Funnel plot for desaturation
